## 12 **Recording of intellectual disability in general hospitals 2006-2019: cohort study using linked** 13 **datasets**

14

### 15 **Abstract**

16

### 17 **Background**

18 Accurate recognition and recording of intellectual disability in those who are admitted to general  
19 hospitals is necessary for making reasonable adjustments, ensuring equitable access, and monitoring  
20 quality of care. In this study we determined the rate of recording of intellectual disability in those  
21 with the condition who were admitted to hospital, and factors associated with the condition being  
22 unrecorded.

### 23 **Methods and Findings**

24 Retrospective cohort study using two linked datasets of routinely collected clinical data. We  
25 identified adults with diagnosed intellectual disability in a large secondary mental healthcare  
26 database and used general hospital records to investigate recording of intellectual disability when  
27 people were admitted to general hospitals between 2006 and 2019. Trends over time and factors  
28 associated with intellectual disability being unrecorded were investigated. We obtained data on  
29 2,477 adults with intellectual disability who were admitted to a general hospital in England at least  
30 once during the study period (total number of admissions=27,314; median number of admissions=5).  
31 People with intellectual disability were accurately recorded as having the condition during 2.9%  
32 (95%CI 2.7-3.1%) of their admissions. Broadening the criteria to include a non-specific code of  
33 learning difficulty increased recording to 27.7% (95%CI 27.2-28.3%) of all admissions. Having a mild  
34 intellectual disability and being married were associated with increased odds of the intellectual  
35 disability being unrecorded in hospital records. We had no measure of quality of hospital care  
36 received and could not relate this to the presence or absence of a record of intellectual disability in  
37 the patient record.

38 **Conclusions**

39 Recognition and recording of intellectual disability in adults admitted to English general hospitals  
40 needs to be improved. Staff awareness training, screening at the point of admission, and data  
41 sharing between health and social care services could improve care for people with intellectual  
42 disability.

43 **Recording of intellectual disability in general hospitals 2006-2019: cohort study using linked**  
44 **datasets**

45 **Manuscript**

46

47 **Introduction**

48

49 Intellectual disability is a lifelong disorder characterised by deficits in general cognitive ability and  
50 impaired functional skills [1]. People with intellectual disability constitute between 1 and 2% of the  
51 population, equating to approximately one million people in England alone [2]. Adults with  
52 intellectual disability have worse physical and mental health than those without intellectual  
53 disability, including higher rates of long-term conditions and complex multi-morbidity [3, 4, 5], and  
54 die up to 20 years younger than the general population [6, 7]. This mortality gap is consistent across  
55 high-income countries [8]. Furthermore, roughly one-third of deaths of people with intellectual  
56 disability are potentially avoidable with the provision of good quality healthcare [6, 9, 10, 11].  
57 Addressing the health inequalities experienced by this group is a priority for governments in the  
58 United Kingdom (UK) and beyond [12, 13].

59

60 People with intellectual disability are more likely to be admitted to general hospitals, where they  
61 stay longer than those without intellectual disability [14, 15]. They are at risk of receiving poor  
62 quality care and of their needs not being met for reasons that include; lack of knowledge and  
63 understanding amongst health professionals, diagnostic overshadowing, and institutional  
64 discrimination [16, 17, 18]. People with intellectual disability and their carers frequently report poor  
65 experiences of general hospital care, including inadequate communication and failure to  
66 acknowledge carers' expertise [19, 20, 21].

67

68 Recognition of intellectual disability is essential to allow additional support needs to be identified  
69 and reasonable adjustments for these. *Healthcare for All*, a UK government-funded inquiry into  
70 access to healthcare for people with intellectual disability, highlighted the need to identify people  
71 with intellectual disability at all points of healthcare delivery, including hospital admission [17].  
72 However, little information exists on how well intellectual disability is recognised and recorded in  
73 general hospital settings. One existing study suggests poor recording of intellectual disability in  
74 people who are admitted to hospital, but was based on ecological data which is at risk of bias [22].

75

76 In this study, we sought to:

- 77 1. investigate the recording of intellectual disability in adults with a confirmed intellectual  
78 disability diagnosis who were admitted to general hospitals
- 79 2. analyse changes in recording of intellectual disability in those admitted to hospital over  
80 time
- 81 3. identify clinical and socio-demographic factors associated with intellectual disability  
82 being unrecorded in those with the condition

83

## 84 **Methods**

85

### 86 *Study setting*

87 This study was conducted in England where most healthcare is provided by the National Health  
88 Service (NHS), a state-funded provider. Secondary (specialist) healthcare is delivered by  
89 organisations known as Trusts. Acute Trusts provide general hospital services for physical health  
90 problems, including in-patient and out-patient facilities, emergency departments, and surgical care.  
91 Mental health Trusts provide secondary mental healthcare including services for the assessment,  
92 diagnosis, and psychiatric management of people with intellectual disability.

93

94 The South London and Maudsley (SLaM) NHS Trust is one of the largest providers of secondary  
95 mental healthcare in Europe, serving a population of approximately 1.2 million people distributed  
96 between four demographically diverse south London boroughs. SLaM’s comprehensive mental  
97 healthcare services include those for diagnosis and psychiatric management of people with  
98 intellectual disability, which are provided by dedicated multi-disciplinary community learning  
99 disability teams (CLDTs) in each borough.

100

#### 101 *Study design and data source*

102 This is a retrospective cohort study using data from two linked clinical datasets, the SLaM Biomedical  
103 Research Centre (BRC) case register, and the English Hospital Episode Statistics (HES) database.

104

#### 105 *South London and Maudsley Biomedical Research Centre Case Register*

106 The SLaM BRC case register contains de-identified electronic health records (EHRs) of over 500,000  
107 patients who have received care from any SLaM service since April 2006 [23]. Data are recorded  
108 either in structured fields (e.g. age, ethnicity, diagnosis) or as part of the unstructured free text  
109 record consisting of correspondence and other clinical case notes. The Clinical Record Interactive  
110 Search (CRIS) software was created to enable users to extract demographic and clinical information  
111 from the EHR for scientific research [23]. CRIS deploys over 100 natural language processing (NLP)  
112 algorithms developed on General Architecture for Text Engineering (GATE) software [24], developed  
113 over the last 10+ years, to extract relevant information from the free text record [25], in addition to  
114 data from structured fields.

115

#### 116 *Hospital Episode Statistics database*

117 Hospital Episode Statistics (HES) is a national dataset compiled by NHS general hospital providers,  
118 and curated by NHS Digital, that includes details of all admissions, out-patient appointments, and  
119 attendances to emergency departments in England [26]. HES data are used to monitor activity and

120 as the basis for remunerating hospitals for the care they provide; they can also be used for  
121 secondary research in a fully anonymised format. We used HES inpatient admission data which  
122 include diagnoses identified during the hospital contact, recorded using codes of the International  
123 Statistical Classification of Diseases and Related Health Problems, 10<sup>th</sup> edition (ICD-10) [27]. Up to 20  
124 diagnostic codes can be added for each patient's HES record. We also obtained admission and  
125 discharge dates, and admission route (elective/planned or non-elective/emergency).

126

### 127 *Study participants*

128 We retrieved records of all adults ( $\geq 18$  years) in the SLaM BRC case register with a diagnosis of  
129 intellectual disability who had received care from SLaM NHS Trust between 2006 and 2019. A  
130 diagnosis of intellectual disability and was taken as either a record of an ICD-10 code within the  
131 mental retardation subchapter (ICD-10 code F70 to F79) or a diagnosis of intellectual disability in the  
132 free text, extracted using the relevant NLP algorithm. These individuals' patient records were linked  
133 with HES data over the same period using approved secure processes via the SLaM Clinical Data  
134 Linkage Service [28], to identify all general hospital admissions during the study period and  
135 diagnoses recorded within the general hospital setting during each admission.

136

### 137 *Co-variables*

138 The following data were extracted from the structured fields of the SLaM BRC case register for each  
139 participant using the recording closest to their first general hospital admission: age, sex, ethnicity  
140 (white, Asian, Black, mixed, other), marital status (married, civil partnership, co-habiting, single,  
141 divorced, separated, widowed). Degree of intellectual disability (mild, moderate, severe, profound)  
142 was extracted first from the patient's latest ICD-10 diagnostic code (where the second character  
143 denotes level of disability) or, if this was not specified, using the Health of the Nation Outcome  
144 Scales for People with Learning Disabilities (HONOS-LD), an outcome measure recommended for  
145 routine clinical use with this population [29], or from free text records. Socio-economic status of

146 participants was estimated using the Index of Multiple Deprivation (IMD), a widely used  
147 neighbourhood-level (each area comprising approximately 1500 individuals) measure of relative  
148 deprivation based on 37 indicators related to the patient's address [30].

149

#### 150 *Analysis*

151 The BRC Case Register record of intellectual disability was used as the 'gold standard' diagnosis  
152 against which recording of intellectual disability in general hospitals was tested. The intellectual  
153 disability services within SLAM that contribute to the BRC register specialise in diagnosis and  
154 management of people with intellectual disability. It is standard procedure to add these diagnoses to  
155 the record using a structured electronic form. Diagnosis of intellectual disability is by trained  
156 professionals who are experienced in using standard classification systems and is expected to be  
157 made following a combination of formal cognitive testing, assessment of adaptive functioning, and  
158 evidence that deficits have been present since at least childhood, so we judged that the specialist  
159 secondary mental health service would be an appropriate gold-standard.

160

161 Summary statistics were used to describe the sample. We calculated sensitivity of recording of  
162 intellectual disability in general hospital records (HES) after the first recorded diagnosis in the BRC

163 Case Register:

- 164 a. for each admission (proportion of all admissions of people with intellectual disability  
165 during which intellectual disability is recorded) (admission sensitivity)
- 166 b. for each patient (proportion of people with intellectual disability who have the diagnosis  
167 recorded in any hospital admission) (patient-level sensitivity)
- 168 c. for emergency admissions only (proportion of all emergency (non-elective) admissions  
169 of people with intellectual disability in which intellectual disability is recorded), as the  
170 majority of elective admissions are only brief and recurrent admissions e.g. for renal



171 dialysis or wound dressing during which we judged full diagnostic assessment may not  
172 be appropriate or customary.

173

174 For each of these we investigated intellectual disability recording in the HES data using:

175 i. ICD-10 intellectual disability codes (F70-F79)

176 ii. ICD-10 intellectual disability codes (F70-F79) and a single additional code, F81.9

177 (developmental disorder of scholastic skills, unspecified), which we noted during initial  
178 exploration of the data was used in a significant proportion of people with a BRC case  
179 register diagnosis

180

181 We investigated time trends in recording of intellectual disability in general hospitals by reporting  
182 the proportion of each individual's first emergency hospital admission between 2006 and 2019 in  
183 which intellectual disability was recorded. We reported on the trend using chi-squared test for  
184 trend.

185

186 We used logistic regression to identify factors associated with intellectual disability (F70-F79) being  
187 unrecorded in HES data. Univariate regression was conducted for each variable followed by  
188 multivariable analysis adjusted for each co-variate and number of hospital admissions in the study  
189 period. Marital status was collapsed into a binary variable for this stage of the analysis (married or  
190 unmarried) in response to small numbers in some response categories. In a sensitivity analysis, we  
191 used multiple imputation by chained equations to impute missing values for all variables that  
192 contained missing data [31] and conducted logistic regression on each of twenty imputed datasets,  
193 combining coefficients using Rubin's rules [32]. All analysis was performed using STATA v14.

194

195 *Ethics*

196 The SLaM BRC Case Register and CRIS have received ethical approval from the Oxfordshire Research  
 197 Ethics Committee C (18/SC/0372) for secondary analysis of deidentified health data. Researchers did  
 198 not have access to patient-identifiable information.

199

200 **Results**

201

202 *Sample characteristics*

203 The sample comprised 2,477 adults with intellectual disability who were admitted a general hospital  
 204 in England at least once over the course of the study period. Details of the sample are provided in  
 205 table 1. There was a slight preponderance of males (53.9%) and the majority had mild intellectual  
 206 disability (59.1% with data available). The average age at first general hospital admission was 44  
 207 years. The largest ethnic group was white. Most (83.5%) were unmarried.

208

209 **Table 1** Demographics of adults with diagnosed intellectual disability admitted to an English general  
 210 hospital during the study period ( $n=2,477$ )

|                                          |           | <b>n</b>    | <b>%</b> |
|------------------------------------------|-----------|-------------|----------|
| <b>Age</b>                               | Mean (SD) | 44.0 (16.1) | -        |
| <b>Degree of intellectual disability</b> | Mild      | 928         | 37.5     |
|                                          | Moderate  | 420         | 17.0     |
|                                          | Severe    | 208         | 8.4      |
|                                          | Profound  | 13          | 0.5      |
|                                          | Missing   | 908         | 36.7     |
| <b>Sex</b>                               | Male      | 1,335       | 53.9     |
|                                          | Female    | 1,142       | 46.1     |
| <b>Ethnicity</b>                         | White     | 1,517       | 61.2     |
|                                          | Asian     | 114         | 4.6      |
|                                          | Black     | 539         | 21.8     |
|                                          | Mixed     | 73          | 3.0      |
|                                          | Other     | 56          | 2.3      |

|                             |              |             |      |
|-----------------------------|--------------|-------------|------|
|                             | Missing      | 178         | 7.2  |
| <b>Marital status*</b>      | Married      | 112         | 4.5  |
|                             | Unmarried    | 2,068       | 83.5 |
|                             | Missing      | 297         | 12.0 |
| <b>Deprivation score**</b>  | Mean (SD)    | 29.1 (10.7) | -    |
|                             | Missing      | 71          | -    |
| <b>Number of admissions</b> | Range        | 1-740       | -    |
|                             | Median (IQR) | 5 (3-10)    | -    |

211 \*married includes civil partner, co-habiting; unmarried includes single, widowed, divorced

212 \*\*deprivation score is the Index of Multiple Deprivation. Higher scores indicate a greater degree of  
213 deprivation.

214

215 There were 27,314 discrete admissions to general hospitals over the study period; 16,270 were non-  
216 elective admissions and the remainder (11,044) were elective admissions (e.g. for planned surgery,  
217 routine dialysis, or change of wound dressing). The median number of total admissions per patient  
218 was 5.

219

#### 220 *Sensitivity of general hospital recording of intellectual disability*

221 Taking each of the 27,314 admissions independently, 788 had a HES record of intellectual disability  
222 (F70-79) (admission-level sensitivity = 2.9%, 95%CI = 2.7, 3.1). Of each emergency admission (n=  
223 16,270), 319 had a record of intellectual disability (sensitivity = 2.0%, 95%CI 1.8, 2.2). Of the 2,477  
224 people who were admitted to hospital, 445 had a record of intellectual disability defined using  
225 intellectual disability codes (F70-79) at any time in their general hospital record (patient-level  
226 sensitivity = 18.0%, 95%CI = 16.5, 19.5).

227

228 Including the ICD-10 code F81.9 (developmental disorder of scholastic skills, unspecified) in addition  
229 to the F70-79 codes resulted in a notable increase in those with intellectual disability who were

230 recorded in the general hospital record (admission-level sensitivity = 27.7% (27.2, 28.3); patient-level  
 231 sensitivity = 66.3% (64.4, 68.1) (table 2).

232

233 **Table 2** Sensitivity of recording of intellectual disability in English general hospital records 2006-2019  
 234 for individual admissions and for individual patients by ICD-10 code group

|                                                       | Sensitivity (95% CI)    |                                                                                     |
|-------------------------------------------------------|-------------------------|-------------------------------------------------------------------------------------|
| <b>ICD-10 descriptor</b>                              | Intellectual disability | Intellectual disability<br>Developmental disorder of scholastic skills, unspecified |
| <b>ICD-10 codes</b>                                   | F70-79                  | F70-79 and F81.9                                                                    |
| <b>For each admission (admission sensitivity)</b>     | 2.9 (2.7, 3.1)          | 27.7 (27.2, 28.3)                                                                   |
| <b>For each patient (patient-level sensitivity)</b>   | 18.0 (16.5, 19.5)       | 66.3 (64.4, 68.1)                                                                   |
| <b>For each admission (emergency admissions only)</b> | 2.0 (1.8, 2.2)          | 32.7 (32.0, 33.4)                                                                   |

235

236

237 *Time trends in recording intellectual disability in general hospital records*

238 Data for recording of intellectual disability stratified by year for the first emergency admission of  
 239 each patient are shown in Fig 1. Strict recording of intellectual disability using F70-79 codes showed  
 240 little overall change over the study period. Including the F81.9 code with F70-F79 codes showed a  
 241 consistent increase in those who were identified, from 17.5% (95% CI = 13.8, 21.7) in 2005 to 62.5%  
 242 (40.6, 81.2) in 2019 ( $\chi^2$  for trend = 138.7,  $p < 0.0001$ ). Raw data and proportions are given in  
 243 supporting information (table S1).

244

245 **Fig 1** Time trends in recording of intellectual disability in those admitted to a general hospital in  
246 England, 2005-2019

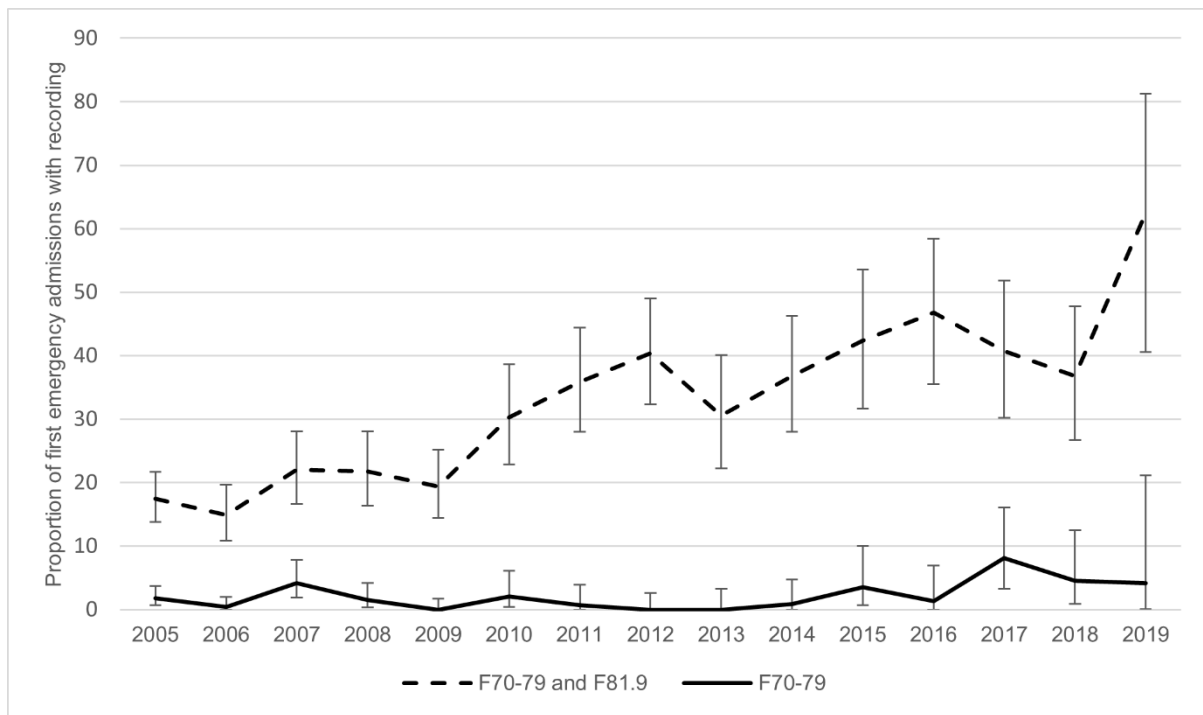

247

248

249 *Associations with intellectual disability being unrecorded in hospital records*

250 Factors associated with a person with intellectual disability never having this accurately recorded (as  
251 ICD-10 codes F70-F79) in their general hospital record were investigated (table 3). In the adjusted  
252 analysis, having more severe intellectual disability was associated with lower odds of intellectual  
253 disability being unrecorded (adjusted odds ratio (aOR) for severe vs mild intellectual disability 0.30  
254 (0.20, 0.46),  $p < 0.001$ ), and being married was associated with higher odds of intellectual disability  
255 being unrecorded (aOR 3.12, 95%CI 1.10, 8.81,  $p = 0.03$ ). Regression results with imputed values were  
256 similar and are given in supporting information (table S2).

257

258

259

260

261 **Table 3** Odds of intellectual disability being unrecorded in the general hospital record of adults with  
262 intellectual disability attending hospital

|                                      |                                    | Univariate analysis      |                  | Adjusted analysis*       |                  |
|--------------------------------------|------------------------------------|--------------------------|------------------|--------------------------|------------------|
|                                      |                                    | Odds Ratio<br>(95%CI)    | p-value          | Odds Ratio<br>(95%CI)    | p-value          |
| <b>Age</b>                           | (OR per 10 years older age)        | 1.13 (1.05, 1.20)        | <0.001           | 1.08 (0.98, 1.18)        | 0.11             |
| <b>Sex</b>                           | Female (reference)                 | 1                        | -                | 1                        | -                |
|                                      | Male                               | 1.05 (0.86, 1.30)        | 0.61             | 1.28 (0.95, 1.73)        | 0.11             |
| <b>Degree of learning disability</b> | Mild (reference)                   | 1                        | -                | 1                        | -                |
|                                      | Moderate                           | <b>0.68 (0.50, 0.93)</b> | <b>0.02</b>      | <b>0.59 (0.42, 0.83)</b> | <b>0.03</b>      |
|                                      | Severe                             | <b>0.39 (0.27, 0.55)</b> | <b>&lt;0.001</b> | <b>0.30 (0.20, 0.46)</b> | <b>&lt;0.001</b> |
|                                      | Profound                           | 0.49 (0.13, 1.79)        | 0.28             | 0.71 (0.14, 3.54)        | 0.67             |
| <b>Ethnicity</b>                     | White (reference)                  | 1                        | -                | 1                        | -                |
|                                      | Asian                              | 1.13 (0.67, 1.90)        | 0.65             | 1.23 (0.60, 2.49)        | 0.57             |
|                                      | Black                              | 0.85 (0.67, 1.10)        | 0.22             | 1.04 (0.72, 1.50)        | 0.86             |
|                                      | Mixed                              | 0.98 (0.53, 1.81)        | 0.94             | 1.85 (0.63, 5.42)        | 0.26             |
|                                      | Other                              | 0.58 (0.32, 1.96)        | 0.88             | 0.79 (0.32, 1.93)        | 0.60             |
| <b>Marital status</b>                | Unmarried (reference)              | 1                        | -                | 1                        | -                |
|                                      | Married                            | <b>2.12 (1.13, 3.99)</b> | <b>0.02</b>      | <b>3.12 (1.10, 8.81)</b> | <b>0.03</b>      |
| <b>Deprivation index</b>             | (OR per decile higher deprivation) | 1.01 (0.91, 1.11)        | 0.92             | 0.96 (0.84, 1.10)        | 0.59             |

263 \*Adjustment for all variables in the table and for number of general hospital admissions during study  
264 period

265

266

267

268

269 **Discussion**

270

271 Accurate recognition and recording of intellectual disability in people who are admitted to general  
272 hospitals is important so that additional support needs can be identified and the necessary  
273 adaptations to care and processes can be provided. These might include communication support,  
274 use of the Mental Capacity Act [33], involving family or paid carers, and addressing issues around  
275 planning safe discharge [34]. Collecting and recording accurate data is also important on a  
276 population level to allow healthcare providers and commissioners to understand their patient group,  
277 allocate adequate resource, and plan services [17].

278

279 Using large, linked datasets of real-world clinical data, we found that intellectual disability was  
280 poorly recorded in people who were admitted to general hospitals. Taking each admission  
281 individually, intellectual disability was accurately recorded in under 3% of all general hospital  
282 admissions and just under one-fifth of those with a confirmed diagnosis of intellectual disability (as  
283 recorded by specialist intellectual disability and mental health services) ever had the condition  
284 accurately recorded in their general hospital records, despite them having several admissions on  
285 average. These findings may reflect poor knowledge and recognition of intellectual disability  
286 amongst general hospital staff, a reluctance to label patients with disabilities, or a lack of  
287 understanding of why this is necessary.

288

289 Low rates of recording may also reflect clinical coding errors. We observed a proportion of adults  
290 with intellectual disability who were coded as having learning *difficulty* using the ICD-10 descriptor  
291 ‘developmental disorder of scholastic skills, unspecified’. This diagnostic category is ill-defined, and  
292 use is discouraged [27] but it might be applied when there are specific deficits in language and  
293 speech development, motor co-ordination, or the development of arithmetic, reading, or spelling  
294 proficiency without global intellectual impairment. Regular use of this code suggests that some form

295 of cognitive impairment was more frequently recognised during the admission; in practice, this code  
296 seems to be used as a proxy for intellectual disability. However, even including the additional code,  
297 one third of people with intellectual disability never had a relevant diagnosis recorded, and these  
298 diagnoses were unrecorded in around three-quarters of admissions. These codes are also likely to be  
299 missed in national administrative returns, leading to under-reporting of healthcare use by people  
300 with intellectual disability. From a research perspective, using a strict definition of intellectual  
301 disability (F70-F79) in future studies using HES will miss a substantial proportion of people who likely  
302 should be included.

303

304 There is no benchmark against which the results of this study can be directly compared, but our  
305 figures show that recording of intellectual disability within general hospitals is lower than recording  
306 of other mental disorders. Similar methodology has reported recording rates of 78% for dementia  
307 [35] and 56% for schizophrenia [36]. Missed recording of intellectual disability is also not only a  
308 problem in secondary care; far fewer people than would be expected are included on intellectual  
309 disability registers held by primary care in England [37].

310

311 Our data indicate that recording of intellectual disability has improved over time only if the related  
312 (but technically incorrect) code of learning difficulty (ICD-10 F81.9) is included. Several factors may  
313 have contributed to this increased recording, including the presence of learning disability liaison  
314 nurses in general hospitals and generally increased awareness of the health needs of people with  
315 intellectual disability [38, 39]. This trend may also reflect overall improvements in diagnostic coding  
316 in HES data that has been observed over time [40].

317

318 Analysis of factors associated with unrecorded diagnosis showed that having a less severe  
319 intellectual disability was independently associated with increased likelihood of intellectual disability  
320 never being recorded in general hospital data. Mild intellectual disability may not be immediately



321 obvious on meeting a person with the condition and specific enquiry may not be included in  
322 standard medical admission assessments. People with intellectual disability who were married,  
323 cohabiting, or in a civil partnership were also more likely *not* to have their intellectual disability  
324 recorded; it may be that assumptions about the lives of people with intellectual disability  
325 contributed to this finding, or that these people had milder intellectual disability which was more  
326 easily missed, even though we adjusted for intellectual disability severity.

327

328 Recording of intellectual disability was similar in non-elective (emergency) admissions as in elective  
329 (planned) admissions. Other studies have shown the recording of dementia and severe mental  
330 illness to be better in non-elective admissions [35, 36]; the universally low rate of recording of  
331 intellectual disability demonstrates further awareness of the condition in general hospitals is  
332 needed.

333

#### 334 *Strengths and limitations*

335 In this study we were able to identify a large representative cohort using a local specialist mental  
336 health and community intellectual disability team case register and link this to a hospital admissions  
337 database with national coverage. The results add to the very limited existing data on the recognition  
338 and recording of intellectual disability in general hospitals in England and will provide impetus for  
339 improvements.

340

341 Our study has some limitations. We used diagnosis of intellectual disability made by a secondary  
342 mental health care service (which includes specialist intellectual disability teams) as the gold-  
343 standard meaning that only individuals with intellectual disability living in the catchment area who  
344 have accessed secondary mental health and intellectual disability services have been included.  
345 However, our use of specialist service data, interrogation of structured fields and free-text records  
346 using natural language processing improves confidence in the diagnosis and this approach has been

347 validated in other mental disorders showing high precision [28]. Our approach allowed the  
348 construction of a large cohort representative of people with clinically diagnosed intellectual  
349 disability, which would not have been possible had we assessed all participants with a standardised  
350 assessment.

351

352 It is possible that some people with intellectual disability, particularly those with specific genetic  
353 conditions such as Down syndrome, were accurately recorded with codes outside the generic ICD-10  
354 intellectual disability codes of F70-F79. This may have caused an under-estimate of the sensitivity of  
355 hospital recording, although only a minority (roughly one-quarter) of people with intellectual  
356 disability have a recognised genetic cause that is eligible to be coded separately, so this would not  
357 account for the degree of under-recording we observed. Furthermore, not all people with genetic  
358 conditions associated with intellectual disability do in fact have intellectual disability, therefore a  
359 code for intellectual disability should still be used where it is relevant.

360

361 This study looks only at recording of intellectual disability in hospital records, using the patient  
362 discharge summary as the source of HES data. Whilst helpful as a first step in contemplating and  
363 instituting reasonable adjustments, recording does not guarantee that adapted person-centred care  
364 will be provided, and we have no measure of the quality of care that was provided. Similarly, it is  
365 possible that in some cases where intellectual disability was not recorded, this was due to a failure  
366 of the administrative process alone, and that intellectual disability was indeed recognised and  
367 managed appropriately during the admission. Even in these cases, however, it is still necessary from  
368 a service-level and surveillance perspective that intellectual disability is documented.

369

### 370 *Clinical and research implications*

371 There is a need for improved recognition and recording of intellectual disability in general hospitals  
372 to improve hospital outcomes and care experiences. An active approach to identification has been

373 suggested, with routine screening questions being asked at entry points to care [41]. Pre-admission  
374 assessments and learning disability identification checklists are recommended to ensure that people  
375 with intellectual disability receive the support they require in hospital and to give advance notice to  
376 staff [42, 43] but are only possible in the case of planned admissions. People with intellectual  
377 disability are more likely than the general population to present to emergency care [44, 45];  
378 automatic flagging of people with intellectual disability attending hospital could be achieved with  
379 better integration of health records between statutory services, underpinned by stringent data  
380 sharing protocols.

381

382 It is important that recognition of intellectual disability is supplemented by staff understanding of  
383 the range of health and communication needs that people with intellectual disability may have.

384 Interventions that have been shown to be effective then need to be implemented, such as  
385 involvement of learning disability liaison nurses and adapted communication approaches. A  
386 programme of mandatory training in autism and learning disability for all staff will soon be  
387 introduced across the UK National Health Service [46] and is hoped will contribute to improvements  
388 in care.

389

## 390 **Conclusions**

391

392 This study demonstrates that, currently, HES data alone cannot be used to identify a cohort of  
393 people with intellectual disability attending hospital, as a significant proportion would be missed.

394 Using a range of sources with health database linkage can increase coverage and provide a powerful  
395 tool for epidemiological research to drive improvements in care in this group.

396

397 Future studies could investigate the experience and outcomes of care between those who were  
398 recorded as having intellectual disability during their admission and those who are not. Similar work

399 could investigate recording of intellectual disability in out-patient clinics. Hospital recognition of  
400 other developmental disorders in whom health inequalities also exist, such as autism and borderline  
401 intellectual functioning, could also be investigated [47, 48].

402

## 403 **References**

- 404 1. World Health Organization. The ICD-11: International classification of diseases 11<sup>th</sup> revision.  
405 Geneva: World Health Organization; 2019.
- 406 2. Public Health England. People with learning disabilities in England 2015: Main Report.  
407 London: Public Health England; 2016.
- 408 3. Emerson E, Hatton C, Baines S, Robertson J. (2016). The physical health of British adults with  
409 intellectual disability: cross sectional study. *Int J Equity Health*. 2016;15:11.
- 410 4. Liao P, Vajdic C, Trollor J, Reppermund S. Prevalence and incidence of physical health  
411 conditions in people with intellectual disability – a systematic review. *PLOS One*.  
412 2021;16(8):e0256294.
- 413 5. Cooper S-A, McLean G, Guthrie B, McConnachie A, Mercer S, Sullivan F, Morrison J. Multiple  
414 physical and mental health comorbidity in adults with intellectual disabilities: population-  
415 based cross-sectional analysis. *BMC Fam Pract*. 2015;16:110.
- 416 6. Heslop P, Blair PS, Fleming P, Hoghton M, Marriott A, Russ L. The Confidential Inquiry into  
417 premature deaths of people with intellectual disabilities in the UK: a population-based study.  
418 *Lancet*. 2014;383:889–95.
- 419 7. Glover G, Williams R, Heslop P, Oyinlola J, Grey J. Mortality in people with intellectual  
420 disabilities in England. *J Intellect Disabil Res*. 2017;61(1):62-74.
- 421 8. O’Leary L, Cooper S-A, Hughes-McCormack L. Early death and causes of death of people with  
422 intellectual disabilities: a systematic review. *J Appl Res Intellect Disabil*. 2018;31:325-342.

- 423 9. Hosking FJ, Carey IM, Shah SM, Harris T, DeWilde S, Beighton C., Cook DG. Mortality among  
424 adults with intellectual disability in England: comparisons with the general population. *Am J*  
425 *Public Health*. 2016;106(8):1483-1491.
- 426 10. Trollor J, Srasuebkuul P, Xu H, Howlett S. Cause of death and potentially avoidable deaths in  
427 Australian adults with intellectual disability using retrospective linked data. *BMJ Open*.  
428 2017;7:e013489.
- 429 11. Hirvikoski T, Boman M, Tideman M, Lichenstein P, Butwicka A. Association of intellectual  
430 disability with all-cause and cause-specific mortality in Sweden. *JAMA Network Open*.  
431 2021;4(6):e2113014.
- 432 12. National Health Service England. The NHS Long Term Plan. NHS England; 2019.
- 433 13. Australian Government Department of Health. National roadmap for improving the health of  
434 people with intellectual disability. Department of Health; 2021.
- 435 14. Dunn K, Hughes-McCormack L, Cooper S-A. Hospital admissions for physical health  
436 conditions for people with intellectual disabilities: systematic review. *J Appl Res Intellect*  
437 *Disabil*. 2018;31(S1):1-10.
- 438 15. Glover G, Williams R, Tompkins G, Oyinlola J. An observational study of the use of acute  
439 hospital care by people with intellectual disabilities in England. *J Intellect Disabil Res*. 2019  
440 63(2):85-99.
- 441 16. Mencap. Death by Indifference. London: Mencap; 2007.
- 442 17. Michael, J. Healthcare for all: report of The Independent inquiry into access for healthcare  
443 for people with learning disabilities: independent inquiry into access to healthcare for  
444 people with learning disabilities. London: Department of Health; 2008.
- 445 18. National Patient Safety Agency. Understanding the patient safety issues for people with  
446 learning disabilities. London: National Health Service. National Patient Safety Agency; 2004.
- 447 19. Iacono T, Bigby C, Unsworth C, Douglas J, Fitzpatrick P. A systematic review of hospital  
448 experiences of people with intellectual disability. *BMC Health Serv Res*. 2015;14:505.

- 449 20. Hart SL. Learning-disabled people's experience of general hospitals. Br Journal of Nurs.  
450 1998;7(8):470-477.
- 451 21. Dinsmore AP. A small-scale investigation of hospital experiences among people with a  
452 learning disability on Merseyside: speaking with patients and their carers. Br J Learn Disabil.  
453 2012;40:201-212.
- 454 22. Glover G, Fox S, Hatton C. General hospital care for people with intellectual disabilities.  
455 Tizard Learn Disabil Rev. 2016;21(1):43-49.
- 456 23. Stewart R, Soremekun M, Perera G, Broadbent M, Callard F, Denis M, et al. The South  
457 London and Maudsley NHS Foundation Trust Biomedical Research Centre (SLaM BRC) case  
458 register: development and descriptive data. BMC Psychiatry. 2009;9:51.
- 459 24. Cunningham H. GATE, a General Architecture for Text Engineering. Comput Hum.  
460 2002;36(2):223-254.
- 461 25. Maudsley Biomedical Research Centre. Natural Language Processing (NLP) Service.  
462 [https://maudsleybrc.nihr.ac.uk/facilities/clinical-record-interactive-search-cris/cris-natural-](https://maudsleybrc.nihr.ac.uk/facilities/clinical-record-interactive-search-cris/cris-natural-language-processing/)  
463 [language-processing/](https://maudsleybrc.nihr.ac.uk/facilities/clinical-record-interactive-search-cris/cris-natural-language-processing/). Accessed 17 August 2022.
- 464 26. NHS Digital. Hospital Episode Statistics (HES). [https://digital.nhs.uk/data-and-](https://digital.nhs.uk/data-and-information/data-tools-and-services/data-services/hospital-episode-statistics)  
465 [information/data-tools-and-services/data-services/hospital-episode-statistics](https://digital.nhs.uk/data-and-information/data-tools-and-services/data-services/hospital-episode-statistics). Accessed 17  
466 August 2022.
- 467 27. World Health Organization. The ICD-10 classification of mental and behavioural disorders:  
468 clinical descriptions and diagnostic guidelines. Geneva: World Health Organization; 1993.
- 469 28. Perera G, Broadbent M, Callard F, Chang C-K, Downs J, Dutta R, et al. Cohort profile of the  
470 South London and Maudsley NHS Foundation Trust Biomedical Research Centre (SLaM BRC)  
471 case register: current status and recent enhancement of an electronic mental health record-  
472 derived data resource. BMJ Open. 2016;6:e008721.
- 473 29. Roy A, Matthews H, Clifford P, Fowler V, Martin DM. Health of the Nation Outcome Scales  
474 for People with Learning Disabilities (HoNOS-LD). Br J Psychiatry. 2002;180:61-66.

- 475 30. Smith T, Noble M, Noble S, Wright G, McLennan D, Plunkett E. *The English indices of*  
476 *deprivation 2015*. London: Department for Communities and Local Government; 2015.
- 477 31. White IR, Royston P, Wood AM. Multiple imputation using chained equations: issues and  
478 guidance for practice. *Stat Med*. 2010;30(4):377-399.
- 479 32. Rubin DB. *Multiple imputation for nonresponse in surveys*. Hoboken: John Wiley & Sons;  
480 2004.
- 481 33. *Mental Capacity Act*. London: Stationery Office; 2005.
- 482 34. Blair J. Care adjustments for people with learning disabilities in hospitals. *Nursing*  
483 *Management*. 2011;18(8):1-24.
- 484 35. Sommerlad A, Perera G, Singh-Manous A, Lewis G, Stewart R, Livingston G. Accuracy of  
485 general hospital dementia diagnoses in England: sensitivity, specificity, and predictors of  
486 diagnostic accuracy 2008-2016. *Alzheimers Dement*. 2018;14:933-943.
- 487 36. Mansour H, Mueller C, Davis KAS, Burton A, Shetty H, Hotopf M, et al. Severe mental illness  
488 diagnosis in English general hospitals 2006-2017: a registry linkage study. *PLOS Med*  
489 2020;17(9):e1003306.
- 490 37. NHS Digital. Health and care of people with learning disabilities experimental statistics 2019-  
491 2020. [https://digital.nhs.uk/data-and-information/publications/statistical/health-and-care-](https://digital.nhs.uk/data-and-information/publications/statistical/health-and-care-of-people-with-learning-disabilities/experimental-statistics-2019-to-2020/data-coverage)  
492 [of-people-with-learning-disabilities/experimental-statistics-2019-to-2020/data-coverage](https://digital.nhs.uk/data-and-information/publications/statistical/health-and-care-of-people-with-learning-disabilities/experimental-statistics-2019-to-2020/data-coverage).  
493 Accessed 17 August 2022.
- 494 38. Sheehan R, Gandesha A, Hassiotis A, Gallagher P, Burnell M, Jones G, et al. An audit of the  
495 quality of inpatient care for adults with learning disability in the UK. *BMJ Open*. 2015;6(4):  
496 e0101480.
- 497 39. MacArthur J, Brown M, McKeachie A, Mack S, Hayes M, Fletcher J. Making reasonable and  
498 achievable adjustments: the contributions of learning disability liaison nurses in 'Getting it  
499 right' for people with learning disabilities receiving general hospital care. *Journal of Applied*  
500 *Nursing* 2015;71(7):1552-2563.

- 501 40. Burns EM, Rigby E, Mamidanna R, Bottle A, Aylin P, Ziprin P, Faiz OD. Systematic review of  
502 discharge coding accuracy. *J Public Health*. 2012;34(1):138-148.
- 503 41. Glover G, Emerson E. Have you got a learning disability? Asking the question and recording  
504 the answer for NHS healthcare providers *Improving Health and Lives. Learning Disabilities  
505 Observatory*; 2012.
- 506 42. Hannon L. Better preadmission assessment improves learning disability care. *Nurs Times*.  
507 2004;100(25):44-47.
- 508 43. National Institute for Health and Care Excellence. Learning disability: care and support of  
509 people growing older. Quality standard [QS187]. London: National Institute for Health and  
510 Care Excellence; 2019.
- 511 44. Walker C, Beck CR, Eccles R, Weston C. Health inequalities and access to health care for  
512 adults with learning disabilities in Lincolnshire. *Br J Learn Disabil*. 2014;44:16-23.
- 513 45. Hosking FJ, Carey IM, DeWilde S, Harris T, Beighton C, Cook DG. Preventable emergency  
514 hospital admissions among adults with intellectual disability in England. *Ann Fam Med*.  
515 2017;15(5):462-470.
- 516 46. Walker C. Mandatory learning disability training for all NHS nurses. *Learning Disabil Pract*.  
517 2019;22(6):6.
- 518 47. Sharpe RA, Curry W, Brown R, Shankar R. A public health approach to reducing health  
519 inequalities among adults with autism. *Br J Gen Pract*. 2019;69(688):534-535.
- 520 48. McManus S, Ali A, Bebbington PE, Brugha T, Cooper C, Rai D, et al. Inequalities in Health and  
521 Service Use among People with Borderline Intellectual Impairment. London: NatCen; 2018.



522 **Supporting information**

523

524 **S1 Table** Time trends in recording intellectual disability in adults admitted to English general  
525 hospitals, 2005-2019

526

527 A) number with intellectual disability recorded with F70-79 (intellectual disability) and F70-79 or F81  
528 (intellectual disability or disorder of scholastic skills not otherwise specified) (first emergency  
529 admission during cohort)

|                       | 2005 | 2006 | 2007 | 2008 | 2009 | 2010 | 2011 | 2012 | 2013 | 2014 | 2015 | 2016 | 2017 | 2018 | 2019 | Total |
|-----------------------|------|------|------|------|------|------|------|------|------|------|------|------|------|------|------|-------|
| <b>F70-F79</b>        |      |      |      |      |      |      |      |      |      |      |      |      |      |      |      |       |
| No (FN)               | 375  | 274  | 205  | 203  | 222  | 139  | 141  | 141  | 111  | 116  | 82   | 78   | 79   | 64   | 23   | 2253  |
| Yes (TP)              | 7    | 1    | 9    | 3    | 0    | 3    | 1    | 0    | 0    | 1    | 3    | 1    | 7    | 3    | 1    | 40    |
| Total                 | 382  | 275  | 214  | 206  | 222  | 142  | 142  | 141  | 111  | 117  | 85   | 79   | 86   | 67   | 24   | 2293  |
| <b>F70-79 and F81</b> |      |      |      |      |      |      |      |      |      |      |      |      |      |      |      |       |
| No (FN)               | 315  | 234  | 167  | 161  | 179  | 99   | 91   | 84   | 77   | 74   | 49   | 42   | 51   | 35   | 9    | 1667  |
| Yes (TP)              | 67   | 41   | 47   | 45   | 43   | 43   | 51   | 57   | 34   | 43   | 36   | 37   | 35   | 32   | 15   | 626   |
| Total                 | 382  | 275  | 214  | 206  | 222  | 142  | 142  | 141  | 111  | 117  | 85   | 79   | 86   | 67   | 24   | 2293  |

530 FN, false negative; TP, true positive

531

532 B) proportion with intellectual disability recorded with F70-79 (intellectual disability) and F70-79 or  
533 F81 (intellectual disability or disorder of scholastic skills not otherwise specified) (first emergency  
534 admission during cohort)

|                             | 2005                 | 2006                 | 2007                 | 2008                 | 2009                 | 2010                 | 2011                 | 2012                 | 2013                 | 2014                 | 2015                 | 2016                 | 2017                 | 2018                 | 2019                 |
|-----------------------------|----------------------|----------------------|----------------------|----------------------|----------------------|----------------------|----------------------|----------------------|----------------------|----------------------|----------------------|----------------------|----------------------|----------------------|----------------------|
| <b>F70-F79</b>              |                      |                      |                      |                      |                      |                      |                      |                      |                      |                      |                      |                      |                      |                      |                      |
| Proportion recorded (95%CI) | 1.8<br>(0.7, 3.7)    | 0.4<br>(0.0, 2.0)    | 4.2<br>(1.9, 7.8)    | 1.5<br>(0.3, 4.2)    | 0.0<br>(0.0, 1.7)    | 2.1<br>(0.4, 6.1)    | 0.7<br>(0.0, 3.9)    | 0.0<br>(0.0, 2.6)    | 0.0<br>(0.0, 3.3)    | 0.9<br>(0.0, 4.7)    | 3.5<br>(0.7, 10.0)   | 1.3<br>(0.0, 6.9)    | 8.1<br>(3.3, 16.1)   | 4.5<br>(0.9, 12.5)   | 4.2<br>(0.1, 21.1)   |
| <b>F70-79 and F81</b>       |                      |                      |                      |                      |                      |                      |                      |                      |                      |                      |                      |                      |                      |                      |                      |
| Proportion recorded (95%CI) | 17.5<br>(13.8, 21.7) | 14.9<br>(10.9, 19.7) | 22.0<br>(16.6, 28.1) | 21.8<br>(16.4, 28.1) | 19.4<br>(14.4, 25.2) | 30.3<br>(22.9, 38.6) | 35.9<br>(28.0, 44.4) | 40.4<br>(32.3, 49.0) | 30.6<br>(22.2, 40.1) | 36.8<br>(28.0, 46.2) | 42.4<br>(31.7, 53.6) | 46.8<br>(35.5, 58.4) | 40.7<br>(30.2, 51.8) | 36.8<br>(26.7, 47.8) | 62.5<br>(40.6, 81.2) |

535 CI, confidence interval

536 **S2 Table** Odds of intellectual disability being unrecorded in the general hospital record of adults with  
 537 intellectual disability attending hospital (with multiple imputation for missing data)

|                                            |                                    | <b>Adjusted analysis*</b> |                  |
|--------------------------------------------|------------------------------------|---------------------------|------------------|
|                                            |                                    | <b>Odds Ratio (95%CI)</b> | <b>p-value</b>   |
| <b>Age</b>                                 | (OR per 10 years older age)        | <b>1.12 (1.05, 1.20)</b>  | <b>0.001</b>     |
| <b>Sex</b>                                 | Female (reference)                 | 1                         | -                |
|                                            | Male                               | 1.06 (0.85, 1.31)         | 0.62             |
| <b>Degree of intellectual disability**</b> |                                    | <b>0.61 (0.51, 0.73)</b>  | <b>&lt;0.001</b> |
| <b>Ethnicity</b>                           | White (reference)                  | 1                         | -                |
|                                            | Asian                              | 1.26 (0.73, 2.18)         | 0.41             |
|                                            | Black                              | 1.90 (0.68, 1.20)         | 0.48             |
|                                            | Mixed                              | 1.09 (0.58, 2.06)         | 0.78             |
|                                            | Other                              | 0.69 (0.36, 1.32)         | 0.26             |
| <b>Marital status</b>                      | Unmarried (reference)              | 1                         | -                |
|                                            | Married                            | <b>2.09 (1.09, 4.00)</b>  | <b>0.03</b>      |
| <b>Deprivation index</b>                   | (OR per decile higher deprivation) | 0.97 (0.87, 1.07)         | 0.53             |

538 \*Adjustment for all variables in the table and for number of general hospital admissions during study  
 539 period

540 \*\*In the imputed analysis degree of intellectual disability was considered a continuous variable
